# Supplementary material for: Clinical, radiographic and immunogenic effects after 1 year of tocilizumab-based treatment strategies in rheumatoid arthritis: the ACT-RAY study
Source: HighWire-hosted journal article supplement (doi:10.1136/annrheumdis-2013-204761), 2014-01-29
Supplement: annrheumdis-2013-204761supp.pdf [file annrheumdis-2013-204761supp.pdf]

**Supplemental Table 1. Number of patients adding open-label DMARDs (first or second)**

| <b>Added open-label DMARDs<br/>(first or second), n</b> | <b>Add-on<br/>N=277</b>     |                             | <b>Switch<br/>N=276</b>     |                             |
|---------------------------------------------------------|-----------------------------|-----------------------------|-----------------------------|-----------------------------|
|                                                         | <b>Week 24-<br/>week 35</b> | <b>Week 36-<br/>week 52</b> | <b>Week 24-<br/>week 35</b> | <b>Week 36-<br/>week 52</b> |
| Azathioprine                                            | 0                           | 1                           | 3                           | 1                           |
| Chloroquine                                             | 7                           | 1                           | 9                           | 1                           |
| Gold                                                    | 0                           | 0                           | 0                           | 0                           |
| Hydroxychloroquine                                      | 34                          | 9                           | 31                          | 9                           |
| Leflunomide                                             | 6                           | 4                           | 15                          | 2                           |
| Sulfasalazine                                           | 27                          | 8                           | 32                          | 7                           |

DMARD, disease-modifying anti-rheumatic drug.

**Supplemental Table 2. Risk mitigation strategy for elevated liver enzymes**

| <b>Lab Value</b> | <b>Action</b>                                                                                                                                                                                                                                                                                                    |
|------------------|------------------------------------------------------------------------------------------------------------------------------------------------------------------------------------------------------------------------------------------------------------------------------------------------------------------|
| >1 to 3 × ULN    | <ul style="list-style-type: none"><li>• Dose modify concomitant DMARDs if appropriate</li><li>• For persistent increases in this range, reduce tocilizumab dose to 4 mg/kg or interrupt tocilizumab until ALT/AST have normalised</li><li>• Restart with 4 mg/kg or 8 mg/kg, as clinically appropriate</li></ul> |
| >3 to 5 × ULN    | <ul style="list-style-type: none"><li>• Interrupt tocilizumab dosing until &lt;3x ULN and follow recommendations above for &gt;1 to 3x ULN</li><li>• For persistent increases &gt;3x ULN, discontinue tocilizumab</li></ul>                                                                                      |
| >5 × ULN         | <ul style="list-style-type: none"><li>• Discontinue tocilizumab</li></ul>                                                                                                                                                                                                                                        |
